# Supplementary material
Source: bioRxiv or medRxiv preprint supplement (https://medrxiv.org/highwire/filestream/80209/field_highwire_adjunct_files/0/2020.05.05.20077610-1.pdf)
Supplement: Supplementary file [file 2020.05.05.20077610-1.pdf]

## Supplementary Appendix

**Table S1. Detail information of Celebrex adjunctive therapy for COVID-19 patients**

| Case No.                          | Gender | Age | Admission date | Stage Classification<br>† | Celebrex adjunctive therapy |                          |            |                                            |                   | Discharged date    |
|-----------------------------------|--------|-----|----------------|---------------------------|-----------------------------|--------------------------|------------|--------------------------------------------|-------------------|--------------------|
|                                   |        |     |                |                           | Enrolled date               | Administration by oral # | Ended date | Outcomes after discontinuation of Celebrex | Side effects      |                    |
| <b>Celebrex group (Full dose)</b> |        |     |                |                           |                             |                          |            |                                            |                   |                    |
| E1                                | Female | 71  | 2020/2/2       | Severe                    | 2020/2/4                    | 0.2g bid                 | 2020/2/15  | Remission                                  | Non               | 2020/3/19          |
| E2                                | Female | 60  | 2020/2/2       | Severe                    | 2020/2/4                    | 0.2g bid                 | 2020/2/15  | Remission                                  | Non               | 2020/2/17          |
| E3                                | Female | 47  | 2020/1/23      | Severe                    | 2020/2/4                    | 0.2g bid                 | 2020/2/9   | Remission                                  | Sweating          | 2020/2/15          |
| E4                                | Male   | 64  | 2020/1/31      | Severe                    | 2020/2/4                    | 0.2g bid                 | 2020/2/15  | Remission                                  | Non               | 2020/3/4           |
| E5                                | Male   | 54  | 2020/1/29      | Severe                    | 2020/2/13                   | 0.2g bid                 | 2020/2/27  | Remission                                  | Mental disorder ‡ | 2020/3/8           |
| E6                                | Female | 58  | 2020/2/6       | Severe                    | 2020/2/6                    | 0.2g bid                 | 2020/2/15  | Remission                                  | Non               | 2020/2/18          |
| E7                                | Male   | 50  | 2020/1/23      | Ordinary                  | 2020/2/13                   | 0.2g bid                 | 2020/2/21  | Remission                                  | Non               | 2020/2/21          |
| E8                                | Male   | 26  | 2020/1/28      | Ordinary                  | 2020/2/4                    | 0.2g bid                 | 2020/2/10  | Remission                                  | Non               | 2020/2/10          |
| E9                                | Female | 63  | 2020/1/29      | Ordinary                  | 2020/2/4                    | 0.2g bid                 | 2020/2/15  | Remission                                  | Non               | 2020/2/29          |
| E10                               | Male   | 33  | 2020/2/15      | Ordinary                  | 2020/2/15                   | 0.2g bid                 | 2020/2/25  | Remission                                  | Non               | 2020/2/25          |
| E11                               | Female | 43  | 2020/1/30      | Ordinary                  | 2020/2/4                    | 0.2g bid                 | 2020/2/17  | Remission                                  | Non               | <b>2020/2/18 ¶</b> |
| E12                               | Male   | 33  | 2020/1/31      | Ordinary                  | 2020/2/9                    | 0.2g bid                 | 2020/2/25  | Remission                                  | Non               | 2020/2/28          |
| E13                               | Female | 62  | 2020/2/5       | Ordinary                  | 2020/2/10                   | 0.2g bid                 | 2020/2/13  | Remission                                  | Non               | <b>2020/2/13 ¶</b> |
| E14                               | Female | 37  | 2020/2/7       | Ordinary                  | 2020/2/10                   | 0.2g bid                 | 2020/2/17  | Remission                                  | Non               | 2020/2/17          |
| E15                               | Male   | 43  | 2020/2/8       | Ordinary                  | 2020/2/10                   | 0.2g bid                 | 2020/2/27  | Remission                                  | Non               | 2020/3/5           |
| E16                               | Male   | 44  | 2020/2/8       | Ordinary                  | 2020/2/8                    | 0.2g bid                 | 2020/2/17  | Remission                                  | Non               | 2020/2/17          |
| E17                               | Female | 31  | 2020/2/8       | Ordinary                  | 2020/2/11                   | 0.2g bid                 | 2020/2/14  | Remission                                  | Non               | 2020/2/21          |
| E18                               | Female | 33  | 2020/2/9       | Ordinary                  | 2020/2/10                   | 0.2g bid                 | 2020/2/16  | Remission                                  | Non               | 2020/3/8           |
| E19                               | Female | 41  | 2020/2/10      | Ordinary                  | 2020/2/11                   | 0.2g bid                 | 2020/2/25  | Remission                                  | liver dysfunction | 2020/3/7           |
| E20                               | Male   | 45  | 2020/2/13      | Ordinary                  | 2020/2/13                   | 0.2g bid                 | 2020/2/27  | Remission                                  | Non               | 2020/3/3           |
| E21                               | Male   | 24  | 2020/2/9       | Ordinary                  | 2020/2/11                   | 0.2g bid                 | 2020/2/18  | Remission                                  | Non               | 2020/3/5           |
| E22                               | Female | 58  | 2020/2/9       | Ordinary                  | 2020/2/10                   | 0.2g bid                 | 2020/2/18  | Remission                                  | Non               | 2020/2/21          |
| E23                               | Female | 45  | 2020/2/15      | Ordinary                  | 2020/2/16                   | 0.2g bid                 | 2020/2/27  | Remission                                  | Non               | 2020/3/3           |
| E24                               | Male   | 47  | 2020/2/14      | Ordinary                  | 2020/2/15                   | 0.2g bid                 | 2020/2/27  | Remission                                  | Non               | 2020/3/3           |
| E25                               | Female | 33  | 2020/2/14      | Ordinary                  | 2020/2/15                   | 0.2g bid                 | 2020/2/24  | Remission                                  | Non               | 2020/2/26          |

| Celebrex group (Half dose) |             |           |                  |                 |                 |                                             |                  |                     |            |                    |
|----------------------------|-------------|-----------|------------------|-----------------|-----------------|---------------------------------------------|------------------|---------------------|------------|--------------------|
| <b>E26 §</b>               | Female      | 55        | 2020/1/26        | <b>Critical</b> | 2020/2/9        | 0.2g qd                                     | 2020/2/16        | <b>Exacerbation</b> | Non        | ICU care           |
| E27                        | Male        | 67        | 2020/1/30        | Ordinary        | 2020/2/5        | 0.2g qd                                     | 2020/3/2         | Remission           | Non        | 2020/3/2           |
| E28                        | Male        | 73        | 2020/1/30        | Ordinary        | 2020/2/6        | 0.2g qd                                     | 2020/2/7         | Remission           | Non        | 2020/2/25          |
| E29                        | Female      | 78        | 2020/2/1         | Ordinary        | 2020/2/4        | 0.2g qd                                     | 2020/2/10        | Remission           | Non        | 2020/2/27          |
| E30                        | Male        | 37        | 2020/2/1         | Ordinary        | 2020/2/5        | 0.2g qd                                     | 2020/2/29        | Remission           | Non        | 2020/2/29          |
| <b>E31 §</b>               | Male        | 57        | 2020/2/1         | <b>Severe</b>   | 2020/2/11       | 0.2g qd                                     | 2020/2/14        | <b>Exacerbation</b> | Non        | 2020/2/29          |
| E32                        | Female      | 62        | 2020/2/2         | Ordinary        | 2020/2/4        | 0.2g qd                                     | 2020/2/8         | Remission           | Non        | 2020/2/10          |
| E33                        | Male        | 30        | 2020/2/3         | Ordinary        | 2020/2/5        | 0.2g qd                                     | 2020/2/14        | Remission           | Non        | 2020/2/20          |
| E34                        | Male        | 59        | 2020/2/3         | Ordinary        | 2020/2/5        | 0.2g qd                                     | 2020/2/10        | Remission           | Non        | 2020/3/2           |
| E35                        | Female      | 53        | 2020/2/3         | Ordinary        | 2020/2/5        | 0.2g qd                                     | 2020/2/14        | Remission           | Non        | 2020/2/24          |
| E36                        | Female      | 81        | 2020/2/4         | Ordinary        | 2020/2/10       | 0.2g qd                                     | 2020/2/12        | Remission           | Non        | 2020/2/21          |
| <b>E37 *</b>               | <b>Male</b> | <b>35</b> | <b>2020/1/29</b> | <b>Ordinary</b> | <b>2020/2/2</b> | <b>ibuprofen<br/>suspension<br/>8ml bid</b> | <b>2020/2/19</b> | <b>Remission</b>    | <b>Non</b> | <b>2020/2/19 ¶</b> |
| Control group              |             |           |                  |                 |                 |                                             |                  |                     |            |                    |
| C1                         | Female      | 65        | 2020/2/2         | Ordinary        | /               | /                                           | /                | <b>Exacerbation</b> | /          | 2020/2/15          |
| C2                         | Male        | 82        | 2020/2/1         | Ordinary        | /               | /                                           | /                | <b>Exacerbation</b> | /          | 2020/2/28          |
| C3                         | Female      | 50        | 2020/2/2         | Ordinary        | /               | /                                           | /                | Remission           | /          | 2020/2/12          |
| C4                         | Female      | 33        | 2020/2/2         | Ordinary        | /               | /                                           | /                | <b>Exacerbation</b> | /          | 2020/2/16          |
| C5                         | Male        | 43        | 2020/2/1         | Ordinary        | /               | /                                           | /                | Remission           | /          | 2020/2/14          |
| C6                         | Male        | 30        | 2020/2/6         | Ordinary        | /               | /                                           | /                | Remission           | /          | 2020/2/13          |
| C7                         | Male        | 44        | 2020/2/1         | Ordinary        | /               | /                                           | /                | Remission           | /          | 2020/2/8           |

†Severity of illness, **mild**: the clinical symptoms are mild and no pneumonia manifestation can be found in CT imaging; **Ordinary**: Fever and respiratory tract symptoms, etc. and pneumonia manifestation can be seen in CT imaging; **Severe**: Meeting any of the following: 1) Respiratory distress, RR≥30 breaths/min; 2) Oxygen saturation ≤ 93% at a rest state; 3) Arterial partial pressure of oxygen (PaO<sub>2</sub>)/oxygen concentration (FiO<sub>2</sub>) ≤ 300mmHg; **Critical**: Meeting any of the following: 1) Respiratory failure occurs and mechanical ventilation is required; 2) Shock occurs; 3) Complicated with other organ failure that requires Intensive care unit (ICU) care.

# bid: twice a day; qd: once a day.

‡The case E5 in the experimental group also administrated with chloroquine phosphate, 0.5 g per day from February 13 to 22.

¶The case E11, E13 and E37 in the experimental group had the SARS-CoV-2 returned to be positive after discharged and re-hospitalized on February 22, 21 and 28 respectively. Recently, three of them were discharged on March 4, 5 and 6.

§The case E26 and E31 in the experimental group were already in the ICU while received the half dose and 8 or 4 days Celebrex treatment, respectively.

\* Celebrex group case E37 was used ibuprofen treatment as a special case, and experienced less therapeutic effect comparison to Celebrex.

## **Interpretation of Table S1**

In the experimental group, case E3 presented with excessive sweating as a suspected side effect of the treatment. The Celebrex treatment was terminated on day 5. In another case, the patient case E5 with a mental disorder was found also taking chloroquine phosphate, 0.5 g per day for nine days. The patient case E19 had a liver dysfunction and found no obvious clues related to this adverse effect (Table S1).

Under routine treatment, there were two cases that progressed to severe type and were transferred into the intensive care unit (ICU). While in the ICU, they received half doses of Celebrex for 4 and 8 days. The Celebrex intervention could not improve the exacerbation status, however, one of them was cured and discharged after two weeks, and the other remained in ICU care (Table S1).

There was a special case in the experimental group, patient case E37 first took Ibuprofen and continued for 17 days without Celebrex. Compared to the Celebrex treatment, this patient experienced that Ibuprofen also aided in the recovery of COVID-19 infection, but had an overall less curative effect than Celebrex (Table S1).

Through March 19, 2020, 36 of 37 cases (97.3%) were recovered and discharged and one critical case (2.7%) was still hospitalized (Table S1).

**Figure S1**

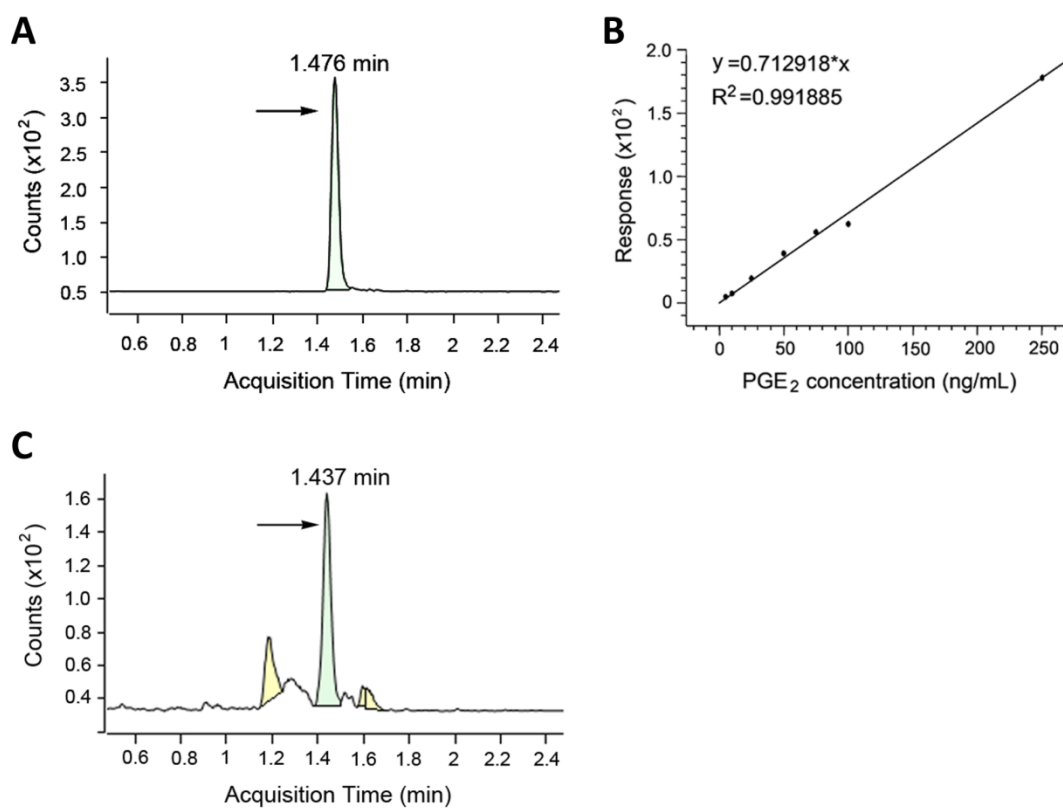

**Figure S1: The measurement of urinary PGE<sub>2</sub> in COVID-19 patients by mass spectrometry.** A: The specific peak of PGE<sub>2</sub> detected by liquid mass spectrometry (the acquisition time was 1.476 min); B: Standard curve of PGE<sub>2</sub> was linearized (the goodness of fit was  $R^2 > 0.99$ ); C: The urine samples of COVID-19 patients showed a specific peak of PGE<sub>2</sub> (the acquisition time was 1.437 min), and the integral area of this specific peak represented the concentration of PGE<sub>2</sub> (arrow).

**Figure S2**

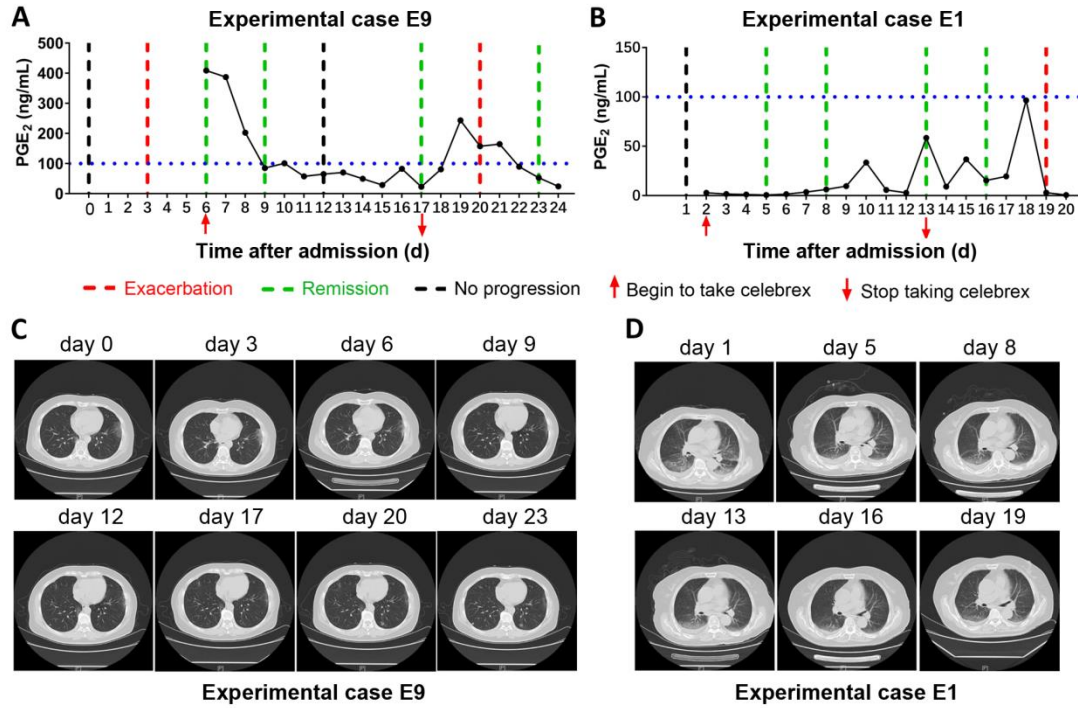

**Figure S2. Withdraw of Celebrex caused PGE<sub>2</sub> elevation and CIVOD-19 condition fluctuation.** A and B: Two represented cases upon the Celebrex termination (case E9 on day 17; case E1 on day 13), followed with increased urinary PGE<sub>2</sub> (case E9 from day 17-20; case E1 from day 13-18); C and D: The representation of the chest CT images (case E 9 on day 19; case E1 on day 20) illustrated exacerbated outcomes upon withdraw of Celebrex.
